# Supplementary material for: The Molecular Resistance Mechanisms of European Earwigs from Apple Orchards Subjected to Different Management Strategies
Source: MDPI journal article supplement (doi:10.3390/insects14120944), 2023-12-13
Supplement: s1 [file s1]

**Table S1.** Primers used in one or two rounds of PCR amplification

| Gene category            | Gene Name        | PCR round             | Hybridization temperature (°C) | Forward primer                 | Reverse primer                |
|--------------------------|------------------|-----------------------|--------------------------------|--------------------------------|-------------------------------|
| Insecticide target genes | Ace 1            | 1 <sup>st</sup> round | 66.5                           | GTATGAACTCCTGTTGACAAGAAGTGGC   | GGAATGCCAGCTTTGGGAAGAGGTG     |
|                          |                  | 2 <sup>nd</sup> round | 60.8                           | TCCTGTTGACAAGAAGTGGCG          | ATGCCAGCTTTGGGAAGAGGTG        |
|                          | Ace 2            | 1 <sup>st</sup> round | 67.5                           | CGAATATTTCCCAGGCTTCTCCG        | ACAAGAGTGGAAGTGGGAGAAGGATTTGG |
|                          | nAChR $\alpha$ 1 | 1 <sup>st</sup> round | 53.7                           | TCAAGCCACAAGCAATCG             | TCCATAACGATCCTCTGATC          |
|                          |                  | 2 <sup>nd</sup> round | 63.5                           | CCACAAGCAATCGCCGCATC           | CGATCCTCTGATCGCAGACGTC        |
|                          | nAChR $\alpha$ 3 | 1 <sup>st</sup> round | 70                             | TTCCACCCACAACGCCAACAG          | ATTGCCATTGCCATTGCCATTGCC      |
|                          |                  | 2 <sup>nd</sup> round | 60                             | CCACAACGCCAACAGGATCATG         | ATTGCCATTGCCATTGCCATTGCC      |
|                          | nAChR $\beta$ 2  | 1 <sup>st</sup> round | 43                             | AGATTATTCCAGCTAGATGTC          | GAAATGTAGCGAAGGTACGA          |
|                          |                  | 2 <sup>nd</sup> round | 69.7                           | AGATGTCCTGGAGCAACCTGTG         | GCGAAGGTACGAATTGAGTTCCG       |
|                          | GluCl iso1       | 1 <sup>st</sup> round | 57.5                           | CCACATAGTTCCACCATGCT           | ACTTGATAGATGGGTGGGTT          |
|                          |                  | 2 <sup>nd</sup> round | 66.5                           | ACATAGTTCCACCATGCTGTGGTATG     | GATGGGTGGGTTTTGAGATCATAGTC    |
|                          | GluCl iso2       | 1 <sup>st</sup> round | 59.2                           | CCACATAGTTCCACCATGCT           | ACTTGATAGATGGGTGGGTT          |
|                          |                  | 2 <sup>nd</sup> round | 63.5                           | ACATAGTTCCACCATGCTGTGGTATG     | GATGGGTGGGTTTTGAGATCATAGTC    |
|                          | Para F1          | 1 <sup>st</sup> round | 58.5                           | CCCATAAACCCACAAACCCCTTC        | CACCCAGTTTTTCATGCGTAAGTTC     |
|                          |                  | 2 <sup>nd</sup> round | 63.5                           | TTGACGTCTTCGACGTCGAGCC         | CACCCAGTTTTTCATGCGTAAGTTC     |
|                          | Para F2          | 1 <sup>st</sup> round | 66.5                           | GGATCATCACGATATGATAAGGGACATGGC | GCTAAGCGTATCTTCAATAATCGAGCCAG |

|                         |                  |                          |      |                             |                               |
|-------------------------|------------------|--------------------------|------|-----------------------------|-------------------------------|
|                         | Para F3          | 1 <sup>st</sup><br>round | 59.2 | GATCTCGAAGAAGAAGAAGGCG      | AGCGCGTTTCAGGACGGATC          |
|                         |                  | 2 <sup>nd</sup><br>round | 70   | CTCGAAGAAGAAGAAGGCGAAGAGC   | GTTTCAGGACGGATCGAGACGG        |
|                         | RyR              | 1 <sup>st</sup><br>round | 60.8 | GGATGACTCGAATTGCAGCCTATACTC | CAGCATCTTCAAACGATTGAGTGAG     |
| Detoxification<br>genes | CCE B            | 1 <sup>st</sup><br>round | 59.2 | CTGGATCGCTTCGGTTCAAG        | GGCAATCCTCGTTTCCATCC          |
|                         | CCE E            | 1 <sup>st</sup><br>round | 60   | AGCGAAGAAAATCAGCCGTG        | CTTCCGATCTGTTTATTTAAGTTTAC    |
|                         |                  | 2 <sup>nd</sup><br>round | 62   | GAAGAAAATCAGCCGTGTTTCGTAATG | CTGTTTATTTAAGTTTACAATTCGTCAGG |
|                         | CYP4G189         | 1 <sup>st</sup><br>round | 60   | GATCATTCAAGTGGCCTCATTGATAAG | CGATTCTATTCCATTGAGCTAGAAGG    |
|                         |                  | 2 <sup>nd</sup><br>round | 66.5 | CATTCAAGTGGCCTCATTGATAAG    | CTATTCCATTGAGCTAGAAGGAGG      |
|                         | CYP6NP1          | 1 <sup>st</sup><br>round | 63.7 | ATCATTCCGCCGCATTGAACAGT     | CCTGGAATCGAGTCTGGCACTTG       |
|                         |                  | 2 <sup>nd</sup><br>round | 60   | CCGCCGCATTGAACAGTTTAACC     | GAATCGAGTCTGGCACTTGG          |
|                         | CYP6NQ1<br>N-ter | 1 <sup>st</sup><br>round | 62   | GCACTAACTATGTTACTGTGGATTC   | CTCGATTCACTTCTCGATCC          |
|                         |                  | 2 <sup>nd</sup><br>round | 60   | GCACTAACTATGTTACTGTGGATTC   | GGAGGATACTTCCGCAATGTTTC       |
|                         | CYP6NQ1<br>C-ter | 1 <sup>st</sup><br>round | 62.5 | TCATAGCGTTCTCGAATTGAATGAG   | CGTAGGTACCGGATACTGGATAC       |
|                         | CYP6NW1          | 1 <sup>st</sup><br>round | 63.5 | AACCGCGAGACCAATGGATCTCC     | GCGCATGCGCACATTTATCCTTTC      |
|                         | GST D            | 1 <sup>st</sup><br>round | 55.6 | ACTGCACACGCGTCCATTG         | TCCATTTAGAGCACAGAAGTGTAGG     |
|                         |                  | 2 <sup>nd</sup><br>round | 60   | GCACACGCGTCCATTGGAATATC     | GAGCACAGAAGTGTAGGTATTATTG     |
| Control<br>genes        | Actin            | 1 <sup>st</sup><br>round | 58.5 | GCTCTTCCGATCTCCTACAGCAC     | GTCTTTCTGCATAAACTTTTGGTGG     |
|                         | EF1alpha         | 1 <sup>st</sup><br>round | 66.5 | GGGTACAAAGGAGCAATCGGC       | GAAAGAGGGAGGAGTCTACAGCTC      |
|                         | GAPDH            | 1 <sup>st</sup><br>round | 63.5 | CATTAACCTTGCCGTGTCATCAGCC   | GTTCTTACAGTGAGTGGGCTTACTGC    |

**Table S2.** Primers used in quantitative real-time PCR

| Gene Category            | Gene Name        | Forward Primer         | Reverse Primer         | Amplicon size (bp) | PCR efficiency (%) |
|--------------------------|------------------|------------------------|------------------------|--------------------|--------------------|
| Insecticide target genes | Ace 1            | CACGAGGTGGTCAGATGTCT   | TGGGGATTTCGAGGATCATGG  | 86                 | 101                |
|                          | nAChR $\alpha$ 1 | GGATTTTCACGGTGGCTTGT   | CTCCCGGACCCATCATCATC   | 144                | 110                |
|                          | nAChR $\alpha$ 3 | CGGATGGCAATTTTCGAGGTG  | CCACGTCTATTTTCGCACGAG  | 111                | 98                 |
|                          | nAChR $\beta$ 2  | CACCTTCCTAACAGTTCTCGTT | GAAAGCAAGATGGACACGCA   | 81                 | 101                |
| Detoxification genes     | CCE B            | CTGGATCGCTTCGGTTCAAG   | GGCAATCCTCGTTTCCATCC   | 132                | 105                |
|                          | CCE E            | ATCCTGTGCCCGCCAAAC     | CTGGATTCTTAGGAGTGAACAC | 150                | 105                |
|                          | CYP4G189         | TGGAAACGGCTATGGGAGTT   | ATGTGGCGGGTATGGAGAAT   | 100                | 96                 |
|                          | CYP6NP1          | TCCCTGATCCCGAACGTTTC   | ACAATTTTCGTGGTCCTTCGC  | 104                | 104                |
|                          | CYP6NQ1          | CCTGTTATCACGCTTCGGAA   | TTCTGGACCACGCAACAAAA   | 132                | 115                |
|                          | CYP6NW1          | CGTACTCCGCCAATTAACGA   | CAGATGTGAACGTGGGTGAC   | 112                | 104                |
|                          | GST D            | TGCCGATTGACCTGTACTACT  | TGCAGTTTAACGTCCAGGGA   | 85                 | 110                |
| Control genes            | Actin            | GGCTGTGCTCTCGTTGTATG   | AGTCAGATCACGACCAGCAA   | 148                | 103                |
|                          | EF1 alpha        | CAGTGAGAGCTTCGTGATGC   | CAGTCGGTCGAGTTGAAACC   | 114                | 103                |
|                          | GAPDH            | TGGTAGAGGTGCTGCTCAAA   | ACAGGTACACGGAAAGCCAT   | 117                | 101                |

|                                     |    | Loop A                                                 | Loop E                               |     |
|-------------------------------------|----|--------------------------------------------------------|--------------------------------------|-----|
| <i>Forficula auricularia</i> α1     | 92 | WNPEDYGGVDTLHVPSEHIWLPDIVLYNNADGNYEVTIMTKAILHHTGKVVWK  | PPAIYKSFCEIDVEYFPFDEQTCFMKFG         | 172 |
| <i>Forficula auricularia</i> α1 mut |    | WNPEDYGGVDTLHVPSEHIWLPDIVLYNNADGNYEVTIMTKAILHHTGKVVWK  | <b>H</b> PAIYKSFCEIDVEYFPFDEQTCFMKFG |     |
| <i>Drosophila melanogaster</i> α1   |    | WNPDDYGGVDTLHVPSEHIWLPDIVLYNNADGNYEVTIMTKAILHHTGKVVWK  | PPAIXKSFCEIDVEYFPFDEQTCFMKFG         |     |
| <i>Myzus persicae</i> α1            |    | WEPLEYGGVKELYVPSEHIWLPDIVLYNNADGEYVVTMTKAVLHHSKGVMWT   | PPAIFKSSCEIDVRYFPFDQQTCFMKFG         |     |
| <i>Bombyx mori</i> α1               |    | WNPDDYGGVDTLHVPSEHIWLPDIVLYNNADGNYEVTIMTKAILHHDGKVVWK  | PPAIXKSFCEIDVEYFPFDEQTCFMKFG         |     |
| <i>Nilaparvata lugens</i> α1        |    | WNPDEYGGVDTLHVPSEHIWLPDIVLYNNADGNYEVTIMTKAILHHTGKVVWK  | PPAIXKSFCEIDVEYFPFDEQTCFMKFG         |     |
| <i>Drosophila melanogaster</i> α6   |    | WNETEYGGVKDLRITPNKLWKPDVLMYNSADEGFDGTYHTNIVVKHNGSCLYV  | PPGIFKSTCKIDITWFPFDDQHCCEMKFG        |     |
| <i>Apis mellifera</i> α6            |    | WNESEYGGVKDLRITPNKLWKPDILMYNSADEGFDGTYQTNVVVTHNGSCLYV  | PPGIFKSTCKIDITWFPFDDQHCCEMKFG        |     |
| <i>Homo sapiens</i> α6              |    | WDPMEYDGIETLRVPADKIWKPDIVLYNNAVGDFQVEGKTKALLKYNGMITWT  | PPAIFKSSCPMDITFFPFDDHQNCSLKF         |     |
|                                     |    | Loop A                                                 | Loop E                               |     |
| <i>Forficula auricularia</i> β2     | 95 | WDPEEYGGVEMLYVPSEHIWLPDIVLYNNADGNYEVTLMTKATLKYNGEVFWK  | PPAIYKSSCRINVEYFPFDEQSCMMKFG         | 175 |
| <i>Forficula Auricularia</i> β2 mut |    | WDPEEYGRVEMLYVPSEHIWLPDIVLYNNADGNYEVTLMTKATLKYNGEVFWK  | PPAIYKSSCRINVEYFPFDEQSCMMKFG         |     |
| <i>Drosophila melanogaster</i> β2   |    | WDPEEYGGVEQLYVPSEHIWVPDIVLYNNWDGNYEVTLMTKATLKYTGEVFWEP | PPAIYKSSCEMNVEYFPYDEQICFMKFG         |     |
| <i>Diabrotica virgifera</i> v. β2   |    | WDPEEYGGVEMLYVPSEHIWLPDIVLFNNADGNYEVTLMTKATLSYTGVIWKPP | PSIYKSSCEINVQYFPFDEQSCLMKFG          |     |
| <i>Homo sapiens</i> β2              |    | WKPEEFDNMKKVRLPSKHIWLPDVVLYNNADGMYEVSFYSSNAVVSVDGSIFWL | PPAIYKSACKIEVKHFPPDQQNCTMKFR         |     |

**Figure S1:** Multiple sequence alignments of part of the N-terminal domain containing loops A and E of insects and human nAChR subunits. The two cysteines of the Cys-loop motif (CX<sub>13</sub>C) are highlighted in grey, the position of Faα1 P145H and Faβ2 G102R are in bold. Sequences were retrieved from Genbank Dmα1 NP\_524481, Mpα1 CAA57476, Bmα1 ABV45511, Nlα1 BBE49554, Dmα6 NP\_723494, Apα6 NP\_001073564, Hsα6 CAD88994, Dmβ2 NP\_524483, Dvβ2 XP028137095, Hsβ2 AAD45422
